# Supplementary material for: Implication for Nursing Approaches: Developing an Theoretical Framework for Patient-Centered Symptom Management in Hemodialysis Patients from the Perspective of Dual-Dimension to Enhancing and Mitigating Coping Strategies: A Cross-Sectional Study
Source: Research Square preprint supplement (doi:10.21203/rs.3.rs-6023205/v1), 2025-02-21

**Plots**

**symptomburden**


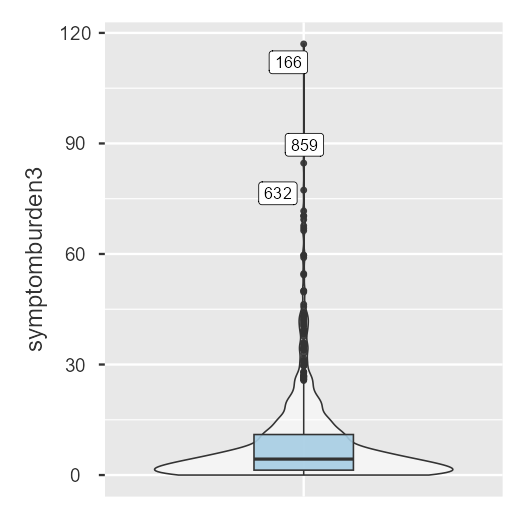


Violin plot


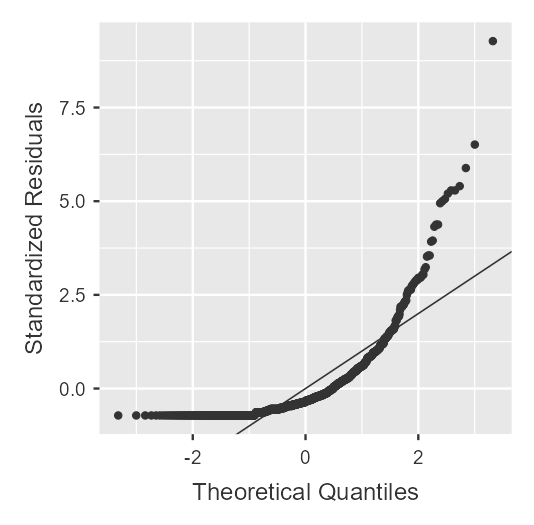


Q-Q plot

| **Iteration history** | | |
| --- | --- | --- |
| Iterations | Fluctuations in Clustering Centers | |
| 1 | 2 |
| 1 | 134.077 | 22.993 |
| 2 | 50.805 | 2.159 |
| 3 | 21.581 | 1.633 |
| 4 | 9.383 | .729 |
| 5 | 9.295 | .760 |
| 6 | 7.485 | .704 |
| 7 | 1.576 | .152 |
| 8 | 2.515 | .246 |
| 9 | 2.321 | .243 |
| 10 | .447 | .048 |
| 11 | .000 | .000 |
|  | | |


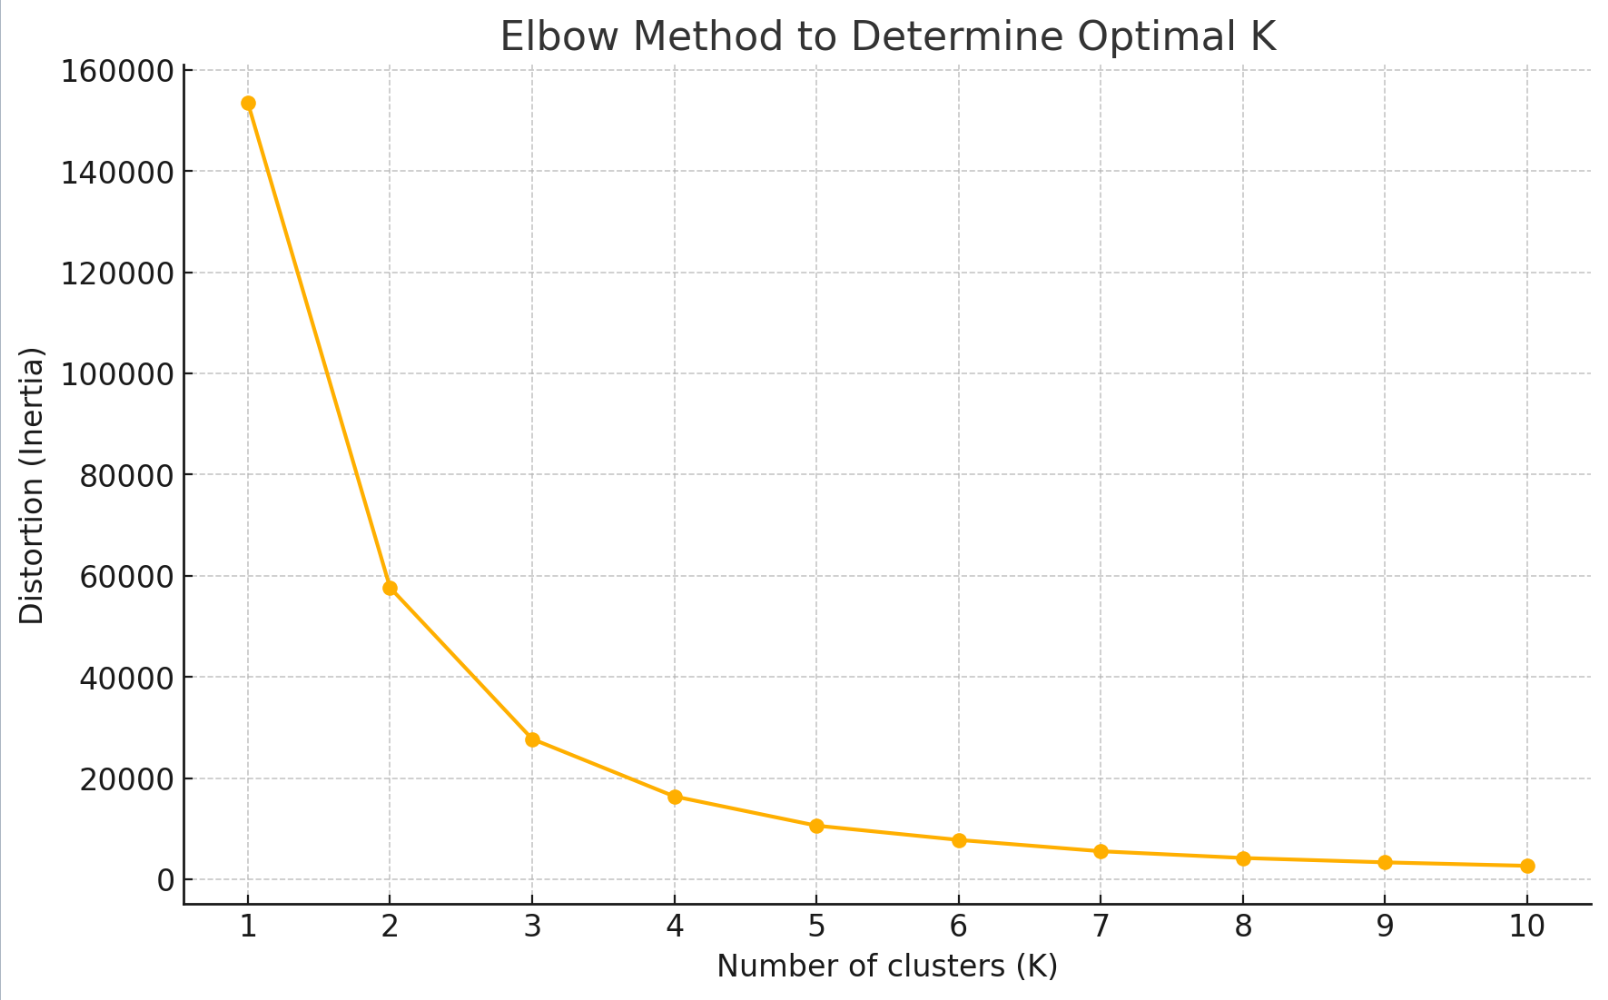

Supplement: Supplementary file 2 [file 0ff21c089a7686d7055968d4.docx]
