# Supplementary material for: Implication for Nursing Approaches: Developing an Theoretical Framework for Patient-Centered Symptom Management in Hemodialysis Patients from the Perspective of Dual-Dimension to Enhancing and Mitigating Coping Strategies: A Cross-Sectional Study
Source: Research Square preprint supplement (doi:10.21203/rs.3.rs-6023205/v1), 2025-02-21
Supplement: Supplementary file 3 [file 6798d891cfa9900cbd812035.docx]

# Exploratory Factor Analysis of modified Perceived Social Support Scale

| Factor Loadings | | | | | |
| --- | --- | --- | --- | --- | --- |
|  | **Factor** | | | |  |
|  | **1** | **2** | **3** | **4** | **Uniqueness** |
| **Q54_Row14** | 0.990 |  |  |  | 0.0419 |
| **Q54_Row15** | 0.971 |  |  |  | 0.0755 |
| **Q54_Row13** | 0.931 |  |  |  | 0.1008 |
| **Q54_Row16** | 0.898 |  |  |  | 0.1494 |
| **Q54_Row11** |  | 0.995 |  |  | 0.0750 |
| **Q54_Row12** |  | 0.965 |  |  | 0.0888 |
| **Q54_Row10** |  | 0.901 |  |  | 0.1305 |
| **Q54_Row9** |  | 0.854 |  |  | 0.1764 |
| **Q54_Row6** |  |  | 0.962 |  | 0.1039 |
| **Q54_Row7** |  |  | 0.941 |  | 0.0997 |
| **Q54_Row8** |  |  | 0.909 |  | 0.1543 |
| **Q54_Row5** |  |  | 0.906 |  | 0.1434 |
| **Q54_Row2** |  |  |  | 0.958 | 0.1410 |
| **Q54_Row3** |  |  |  | 0.911 | 0.1494 |
| **Q54_Row4** |  |  |  | 0.889 | 0.1664 |
| **Q54_Row1** |  |  |  | 0.827 | 0.2502 |
| Note. 'Maximum likelihood' extraction method was used in combination with a 'oblimin' rotation | | | | | |

**Factor Statistics**

| Summary | | | |
| --- | --- | --- | --- |
| **Factor** | **SS Loadings** | **% of Variance** | **Cumulative %** |
| 1 | 3.64 | 22.7 | 22.7 |
| 2 | 3.52 | 22.0 | 44.7 |
| 3 | 3.51 | 21.9 | 66.7 |
| 4 | 3.29 | 20.6 | 87.2 |

**Model Fit**

| Model Fit Measures | | | | | | | |
| --- | --- | --- | --- | --- | --- | --- | --- |
|  | **RMSEA 90% CI** | |  | | **Model Test** | | |
| **RMSEA** | **Lower** | **Upper** | **TLI** | **BIC** | **χ²** | **df** | **p** |
| 0.0681 | 0.0616 | 0.0747 | 0.975 | -51.6 | 384 | 62 | <.001 |

**Assumption Checks**

| Bartlett's Test of Sphericity | | |
| --- | --- | --- |
| **χ²** | **df** | **p** |
| 24735 | 120 | <.001 |

| KMO Measure of Sampling Adequacy | |
| --- | --- |
|  | **MSA** |
| **Overall** | 0.937 |
| **Q54_Row1** | 0.961 |
| **Q54_Row2** | 0.932 |
| **Q54_Row3** | 0.934 |
| **Q54_Row4** | 0.942 |
| **Q54_Row5** | 0.946 |
| **Q54_Row6** | 0.926 |
| **Q54_Row7** | 0.926 |
| **Q54_Row8** | 0.945 |
| **Q54_Row9** | 0.964 |
| **Q54_Row10** | 0.952 |
| **Q54_Row11** | 0.932 |
| **Q54_Row12** | 0.937 |
| **Q54_Row13** | 0.931 |
| **Q54_Row14** | 0.894 |
| **Q54_Row15** | 0.919 |
| **Q54_Row16** | 0.944 |

**Eigenvalues**

**Scree Plot**


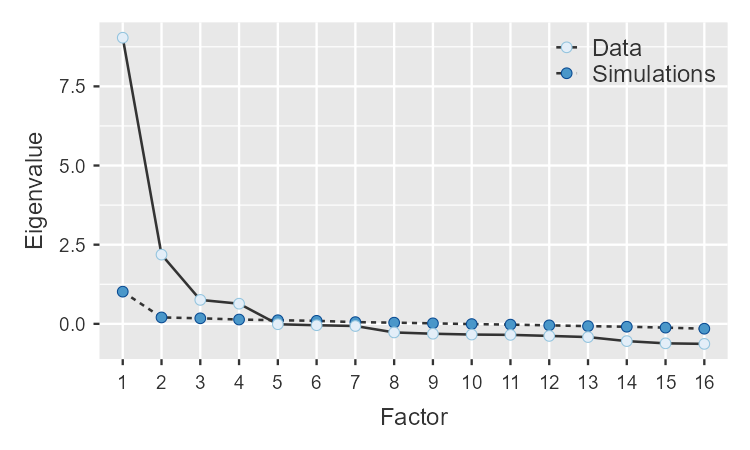


**Results**

**Exploratory Factor Analysis**

| Factor Loadings | | | | | |
| --- | --- | --- | --- | --- | --- |
|  | **Factor** | | | |  |
|  | **1** | **2** | **3** | **4** | **Uniqueness** |
| **Q54_Row14** | 0.990 |  |  |  | 0.0419 |
| **Q54_Row15** | 0.971 |  |  |  | 0.0755 |
| **Q54_Row13** | 0.931 |  |  |  | 0.1008 |
| **Q54_Row16** | 0.898 |  |  |  | 0.1494 |
| **Q54_Row11** |  | 0.995 |  |  | 0.0750 |
| **Q54_Row12** |  | 0.965 |  |  | 0.0888 |
| **Q54_Row10** |  | 0.901 |  |  | 0.1305 |
| **Q54_Row9** |  | 0.854 |  |  | 0.1764 |
| **Q54_Row6** |  |  | 0.962 |  | 0.1039 |
| **Q54_Row7** |  |  | 0.941 |  | 0.0997 |
| **Q54_Row8** |  |  | 0.909 |  | 0.1543 |
| **Q54_Row5** |  |  | 0.906 |  | 0.1434 |
| **Q54_Row2** |  |  |  | 0.958 | 0.1410 |
| **Q54_Row3** |  |  |  | 0.911 | 0.1494 |
| **Q54_Row4** |  |  |  | 0.889 | 0.1664 |
| **Q54_Row1** |  |  |  | 0.827 | 0.2502 |
| Note. 'Maximum likelihood' extraction method was used in combination with a 'oblimin' rotation | | | | | |

**Factor Statistics**

| Summary | | | |
| --- | --- | --- | --- |
| **Factor** | **SS Loadings** | **% of Variance** | **Cumulative %** |
| 1 | 3.64 | 22.7 | 22.7 |
| 2 | 3.52 | 22.0 | 44.7 |
| 3 | 3.51 | 21.9 | 66.7 |
| 4 | 3.29 | 20.6 | 87.2 |

**Model Fit**

| Model Fit Measures | | | | | | | |
| --- | --- | --- | --- | --- | --- | --- | --- |
|  | **RMSEA 90% CI** | |  | | **Model Test** | | |
| **RMSEA** | **Lower** | **Upper** | **TLI** | **BIC** | **χ²** | **df** | **p** |
| 0.0681 | 0.0616 | 0.0747 | 0.975 | -51.6 | 384 | 62 | <.001 |

**Assumption Checks**

| Bartlett's Test of Sphericity | | |
| --- | --- | --- |
| **χ²** | **df** | **p** |
| 24735 | 120 | <.001 |

| KMO Measure of Sampling Adequacy | |
| --- | --- |
|  | **MSA** |
| **Overall** | 0.937 |
| **Q54_Row1** | 0.961 |
| **Q54_Row2** | 0.932 |
| **Q54_Row3** | 0.934 |
| **Q54_Row4** | 0.942 |
| **Q54_Row5** | 0.946 |
| **Q54_Row6** | 0.926 |
| **Q54_Row7** | 0.926 |
| **Q54_Row8** | 0.945 |
| **Q54_Row9** | 0.964 |
| **Q54_Row10** | 0.952 |
| **Q54_Row11** | 0.932 |
| **Q54_Row12** | 0.937 |
| **Q54_Row13** | 0.931 |
| **Q54_Row14** | 0.894 |
| **Q54_Row15** | 0.919 |
| **Q54_Row16** | 0.944 |

**Eigenvalues**

**Scree Plot**


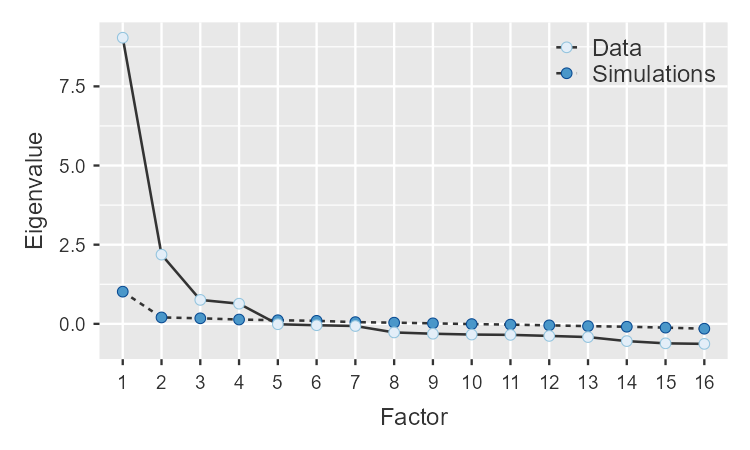


# Confirmatory Factor Analysis of modified Perceived Social Support Scale

| Factor Loadings | | | | | |
| --- | --- | --- | --- | --- | --- |
| **Factor** | **Indicator** | **Estimate** | **SE** | **Z** | **p** |
| **Factor 1** | **Q54_Row1** | 1.33 | 0.0367 | 36.2 | <.001 |
| **Q54_Row2** | 1.35 | 0.0336 | 40.1 | <.001 |
| **Q54_Row3** | 1.37 | 0.0339 | 40.3 | <.001 |
| **Q54_Row4** | 1.37 | 0.0345 | 39.7 | <.001 |
| **Factor 2** | **Q54_Row5** | 1.47 | 0.0363 | 40.6 | <.001 |
| **Q54_Row6** | 1.55 | 0.0369 | 42.1 | <.001 |
| **Q54_Row7** | 1.53 | 0.0360 | 42.7 | <.001 |
| **Q54_Row8** | 1.49 | 0.0369 | 40.3 | <.001 |
| **Factor 3** | **Q54_Row9** | 1.44 | 0.0364 | 39.4 | <.001 |
| **Q54_Row10** | 1.48 | 0.0359 | 41.4 | <.001 |
| **Q54_Row11** | 1.50 | 0.0345 | 43.5 | <.001 |
| **Q54_Row12** | 1.49 | 0.0346 | 43.1 | <.001 |
| **Factor 4** | **Q54_Row13** | 1.32 | 0.0310 | 42.6 | <.001 |
| **Q54_Row14** | 1.34 | 0.0297 | 45.2 | <.001 |
| **Q54_Row15** | 1.29 | 0.0296 | 43.7 | <.001 |
| **Q54_Row16** | 1.24 | 0.0308 | 40.3 | <.001 |

**Factor Estimates**

| Factor Covariances | | | | | |
| --- | --- | --- | --- | --- | --- |
|  |  | **Estimate** | **SE** | **Z** | **p** |
| **Factor 1** | **Factor 1** | 1.000ᵃ |  |  |  |
| **Factor 2** | 0.497 | 0.0238 | 20.9 | <.001 |
| **Factor 3** | 0.650 | 0.0185 | 35.2 | <.001 |
| **Factor 4** | 0.607 | 0.0200 | 30.4 | <.001 |
| **Factor 2** | **Factor 2** | 1.000ᵃ |  |  |  |
| **Factor 3** | 0.732 | 0.0149 | 49.3 | <.001 |
| **Factor 4** | 0.341 | 0.0272 | 12.5 | <.001 |
| **Factor 3** | **Factor 3** | 1.000ᵃ |  |  |  |
| **Factor 4** | 0.497 | 0.0233 | 21.4 | <.001 |
| **Factor 4** | **Factor 4** | 1.000ᵃ |  |  |  |
| ᵃ fixed parameter | | | | | |

| Factor Intercepts | | | | |
| --- | --- | --- | --- | --- |
|  | **Estimate** | **SE** | **Z** | **p** |
| **Factor 1** | 1.00ᵃ |  |  |  |
| **Factor 2** | 1.00ᵃ |  |  |  |
| **Factor 3** | 1.00ᵃ |  |  |  |
| **Factor 4** | 1.00ᵃ |  |  |  |
| ᵃ fixed parameter | | | | |

**Residual Estimates**

| Residual Covariances | | | | | |
| --- | --- | --- | --- | --- | --- |
|  |  | **Estimate** | **SE** | **Z** | **p** |
| **Q54_Row1** | **Q54_Row1** | 0.5885 | 0.02942 | 20.0 | <.001 |
| **Q54_Row2** | **Q54_Row2** | 0.3270 | 0.01938 | 16.9 | <.001 |
| **Q54_Row3** | **Q54_Row3** | 0.3244 | 0.01941 | 16.7 | <.001 |
| **Q54_Row4** | **Q54_Row4** | 0.3626 | 0.02087 | 17.4 | <.001 |
| **Q54_Row5** | **Q54_Row5** | 0.3718 | 0.02013 | 18.5 | <.001 |
| **Q54_Row6** | **Q54_Row6** | 0.2967 | 0.01798 | 16.5 | <.001 |
| **Q54_Row7** | **Q54_Row7** | 0.2542 | 0.01636 | 15.5 | <.001 |
| **Q54_Row8** | **Q54_Row8** | 0.3991 | 0.02113 | 18.9 | <.001 |
| **Q54_Row9** | **Q54_Row9** | 0.4359 | 0.02163 | 20.1 | <.001 |
| **Q54_Row10** | **Q54_Row10** | 0.3264 | 0.01754 | 18.6 | <.001 |
| **Q54_Row11** | **Q54_Row11** | 0.1973 | 0.01269 | 15.5 | <.001 |
| **Q54_Row12** | **Q54_Row12** | 0.2200 | 0.01338 | 16.4 | <.001 |
| **Q54_Row13** | **Q54_Row13** | 0.1977 | 0.01034 | 19.1 | <.001 |
| **Q54_Row14** | **Q54_Row14** | 0.0821 | 0.00683 | 12.0 | <.001 |
| **Q54_Row15** | **Q54_Row15** | 0.1368 | 0.00835 | 16.4 | <.001 |
| **Q54_Row16** | **Q54_Row16** | 0.2820 | 0.01381 | 20.4 | <.001 |

| Residual Intercepts | | | | |
| --- | --- | --- | --- | --- |
|  | **Estimate** | **SE** | **Z** | **p** |
| **Q54_Row1** | 5.27 | 0.0458 | 115.0 | <.001 |
| **Q54_Row2** | 5.37 | 0.0437 | 122.8 | <.001 |
| **Q54_Row3** | 5.25 | 0.0443 | 118.5 | <.001 |
| **Q54_Row4** | 5.33 | 0.0447 | 119.2 | <.001 |
| **Q54_Row5** | 4.42 | 0.0476 | 92.7 | <.001 |
| **Q54_Row6** | 4.20 | 0.0492 | 85.5 | <.001 |
| **Q54_Row7** | 4.37 | 0.0483 | 90.6 | <.001 |
| **Q54_Row8** | 4.33 | 0.0482 | 89.8 | <.001 |
| **Q54_Row9** | 4.84 | 0.0472 | 102.5 | <.001 |
| **Q54_Row10** | 4.72 | 0.0475 | 99.3 | <.001 |
| **Q54_Row11** | 4.76 | 0.0468 | 101.8 | <.001 |
| **Q54_Row12** | 4.76 | 0.0467 | 102.0 | <.001 |
| **Q54_Row13** | 5.66 | 0.0417 | 135.7 | <.001 |
| **Q54_Row14** | 5.74 | 0.0410 | 140.0 | <.001 |
| **Q54_Row15** | 5.79 | 0.0402 | 144.1 | <.001 |
| **Q54_Row16** | 5.89 | 0.0404 | 145.8 | <.001 |

**Model Fit**

| Test for Exact Fit | | |
| --- | --- | --- |
| **χ²** | **df** | **p** |
| 543 | 98 | <.001 |

| Fit Measures | | | | | | | |
| --- | --- | --- | --- | --- | --- | --- | --- |
|  | | | | **RMSEA 90% CI** | |  | |
| **CFI** | **TLI** | **SRMR** | **RMSEA** | **Lower** | **Upper** | **AIC** | **BIC** |
| 0.982 | 0.978 | 0.0203 | 0.0636 | 0.0585 | 0.0689 | 41376 | 41647 |

**Path Diagram**


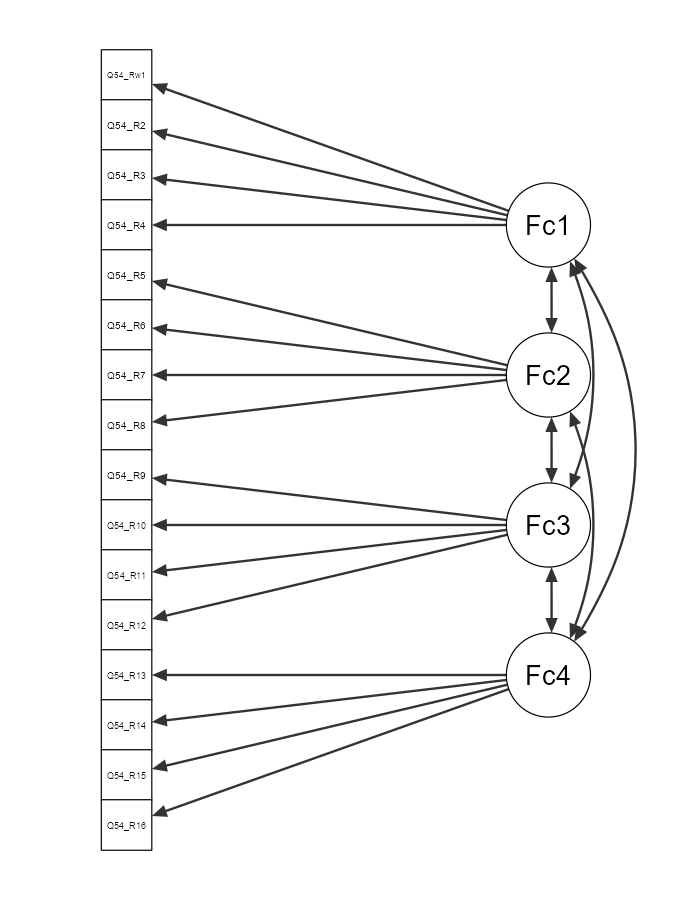


# Exploratory Factor Analysis of Patient Activation Measure 13

| Factor Loadings | | | | |
| --- | --- | --- | --- | --- |
|  | **Factor** | | |  |
|  | **1** | **2** | **3** | **Uniqueness** |
| **Q56_Row1** |  |  | 0.715 | 0.348 |
| **Q56_Row2** |  |  | 0.938 | 0.180 |
| **Q56_Row3** |  |  | 0.788 | 0.249 |
| **Q56_Row4** |  |  | 0.592 | 0.332 |
| **Q56_Row5** |  | 0.775 |  | 0.201 |
| **Q56_Row6** |  | 0.827 |  | 0.189 |
| **Q56_Row7** |  | 0.749 |  | 0.275 |
| **Q56_Row8** |  | 0.702 |  | 0.306 |
| **Q56_Row9** | 0.448 |  |  | 0.410 |
| **Q56_Row10** | 0.777 |  |  | 0.270 |
| **Q56_Row11** | 0.828 |  |  | 0.171 |
| **Q56_Row12** | 0.858 |  |  | 0.220 |
| **Q56_Row13** | 0.867 |  |  | 0.218 |
| Note. 'Maximum likelihood' extraction method was used in combination with a 'promax' rotation | | | | |

**Factor Statistics**

| Summary | | | |
| --- | --- | --- | --- |
| **Factor** | **SS Loadings** | **% of Variance** | **Cumulative %** |
| 1 | 3.57 | 27.4 | 27.4 |
| 2 | 3.24 | 24.9 | 52.4 |
| 3 | 2.82 | 21.7 | 74.1 |

| Inter-Factor Correlations | | | |
| --- | --- | --- | --- |
|  | **1** | **2** | **3** |
| **1** | — | 0.787 | 0.700 |
| **2** |  | — | 0.771 |
| **3** |  |  | — |

**Model Fit**

| Model Fit Measures | | | | | | | |
| --- | --- | --- | --- | --- | --- | --- | --- |
|  | **RMSEA 90% CI** | |  | | **Model Test** | | |
| **RMSEA** | **Lower** | **Upper** | **TLI** | **BIC** | **χ²** | **df** | **p** |
| 0.0853 | 0.0776 | 0.0932 | 0.953 | 89.0 | 384 | 42 | <.001 |

**Assumption Checks**

| Bartlett's Test of Sphericity | | |
| --- | --- | --- |
| **χ²** | **df** | **p** |
| 13678 | 78 | <.001 |

| KMO Measure of Sampling Adequacy | |
| --- | --- |
|  | **MSA** |
| **Overall** | 0.952 |
| **Q56_Row1** | 0.961 |
| **Q56_Row2** | 0.930 |
| **Q56_Row3** | 0.945 |
| **Q56_Row4** | 0.965 |
| **Q56_Row5** | 0.951 |
| **Q56_Row6** | 0.949 |
| **Q56_Row7** | 0.959 |
| **Q56_Row8** | 0.961 |
| **Q56_Row9** | 0.977 |
| **Q56_Row10** | 0.954 |
| **Q56_Row11** | 0.949 |
| **Q56_Row12** | 0.936 |
| **Q56_Row13** | 0.943 |

**Eigenvalues**

| Initial Eigenvalues | |
| --- | --- |
| **Factor** | **Eigenvalue** |
| 1 | 8.3882 |
| 2 | 0.6081 |
| 3 | 0.3243 |
| 4 | 0.0873 |
| 5 | -0.0264 |
| 6 | -0.0507 |
| 7 | -0.0791 |
| 8 | -0.0830 |
| 9 | -0.1011 |
| 10 | -0.1217 |
| 11 | -0.1614 |
| 12 | -0.1816 |
| 13 | -0.2215 |

**Scree Plot**


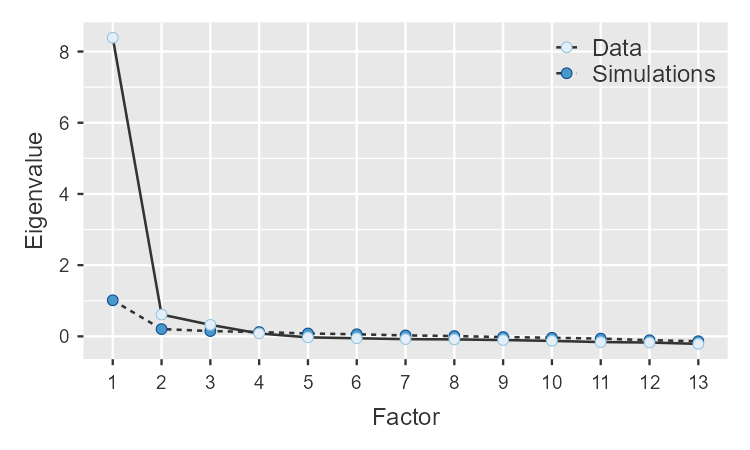


# Confirmatory Factor Analysis of Patient Activation Measure 13

| Factor Loadings | | | | | |
| --- | --- | --- | --- | --- | --- |
| **Factor** | **Indicator** | **Estimate** | **SE** | **Z** | **p** |
| **Factor 1** | **Q56_Row1** | 0.654 | 0.0204 | 32.1 | <.001 |
| **Q56_Row2** | 0.676 | 0.0184 | 36.7 | <.001 |
| **Q56_Row3** | 0.694 | 0.0191 | 36.2 | <.001 |
| **Q56_Row4** | 0.626 | 0.0192 | 32.5 | <.001 |
| **Factor 2** | **Q56_Row5** | 0.672 | 0.0176 | 38.2 | <.001 |
| **Q56_Row6** | 0.692 | 0.0180 | 38.4 | <.001 |
| **Q56_Row7** | 0.636 | 0.0182 | 34.9 | <.001 |
| **Q56_Row8** | 0.650 | 0.0195 | 33.4 | <.001 |
| **Factor 3** | **Q56_Row9** | 0.554 | 0.0187 | 29.6 | <.001 |
| **Q56_Row10** | 0.652 | 0.0184 | 35.5 | <.001 |
| **Q56_Row11** | 0.669 | 0.0170 | 39.3 | <.001 |
| **Q56_Row12** | 0.672 | 0.0183 | 36.8 | <.001 |
| **Q56_Row13** | 0.664 | 0.0181 | 36.7 | <.001 |

**Factor Estimates**

| Factor Covariances | | | | | |
| --- | --- | --- | --- | --- | --- |
|  |  | **Estimate** | **SE** | **Z** | **p** |
| **Factor 1** | **Factor 1** | 1.000ᵃ |  |  |  |
| **Factor 2** | 0.841 | 0.0117 | 72.0 | <.001 |
| **Factor 3** | 0.769 | 0.0148 | 51.8 | <.001 |
| **Factor 2** | **Factor 2** | 1.000ᵃ |  |  |  |
| **Factor 3** | 0.856 | 0.0104 | 82.5 | <.001 |
| **Factor 3** | **Factor 3** | 1.000ᵃ |  |  |  |
| ᵃ fixed parameter | | | | | |

**Model Fit**

| Test for Exact Fit | | |
| --- | --- | --- |
| **χ²** | **df** | **p** |
| 557 | 62 | <.001 |

| Fit Measures | | | | | | | |
| --- | --- | --- | --- | --- | --- | --- | --- |
|  | | | | **RMSEA 90% CI** | |  | |
| **CFI** | **TLI** | **SRMR** | **RMSEA** | **Lower** | **Upper** | **AIC** | **BIC** |
| 0.964 | 0.954 | 0.0292 | 0.0845 | 0.0781 | 0.0910 | 20385 | 20596 |
