# Supplementary material for: Implication for Nursing Approaches: Developing an Theoretical Framework for Patient-Centered Symptom Management in Hemodialysis Patients from the Perspective of Dual-Dimension to Enhancing and Mitigating Coping Strategies: A Cross-Sectional Study
Source: Research Square preprint supplement (doi:10.21203/rs.3.rs-6023205/v1), 2025-02-21
Supplement: Supplementary file 4 [file ff3124a90ded84669907baaa.docx]

**Adaption**

|  | **Importance** | **MV performance** |
| --- | --- | --- |
| **SRF1** | -0.131 | 48.254 |
| **SS2** | 0.139 | 55.502 |
| **SS3** | 0.145 | 62.839 |
| **SS1** | 0.147 | 71.752 |
| **SS4** | 0.154 | 79.487 |

**Patient activation**

|  | **Importance** | **MV performance** |
| --- | --- | --- |
| **SRF1** | -0.026 | 48.254 |
| **SS2** | 0.061 | 55.502 |
| **SS3** | 0.064 | 62.839 |
| **SS1** | 0.065 | 71.752 |
| **SS4** | 0.068 | 79.487 |

**Symptom burden**

|  | **Importance** | **MV performance** |
| --- | --- | --- |
| **PAM3** | -0.011 | 77.125 |
| **ADA1** | -0.009 | 65.937 |
| **ADA2** | -0.009 | 68.914 |
| **ADA3** | -0.008 | 59.665 |
| **PAM1** | -0.008 | 77.679 |
| **PAM2** | -0.008 | 78.103 |
| **SS1** | -0.005 | 71.752 |
| **SS2** | -0.005 | 55.502 |
| **SS3** | -0.005 | 62.839 |
| **SS4** | -0.005 | 79.487 |
| **Time travel to dialysis center** | -0.004 | 46.027 |
| **gender** | -0.001 | -59.107 |
| **SRF1** | 0.004 | 48.254 |
| **minority** | 0.005 | -7.768 |
| **Dialysis_frequency** | 0.007 | 64.435 |
| **age** | 0.008 | 77.564 |
| **education_level** | 0.008 | 7.232 |
| **Income_level** | 0.016 | 27.679 |
| **solitude** | 0.026 | -16.429 |
